# Supplementary material for: Key Roles of CACNA1C/Cav1.2 and CALB1/Calbindin in Prefrontal Neurons Altered in Cognitive Disorders
Source: PubMed Central journal article supplement (PMC11112502; doi:10.1001/jamapsychiatry.2024.1112), 2024-05-22
Supplement: jamapsychiatry-e241112-s003.pdf [file jamapsychiatry-e241112-s003.pdf]

## Data Sharing Statement

Datta. Key Roles of CACNA1C/Cav1.2 and CALB1/Calbindin in Prefrontal Neurons Altered in Cognitive Disorders. *JAMA Psychiatry*. Published May 22, 2024.

doi:10.1001/jamapsychiatry.2024.1112

### Data

**Data available:** No

### Additional Information

**Explanation for why data not available:** All of the data are in the paper already Note this is not a clinical trial or a true genetic association study, but rather human and macaque transcriptomics, and macaque anatomy, physiology and behavior examining mechanism
